# Supplementary material
Source: Research Square preprint supplement (doi:10.21203/rs.3.rs-9234400/v1)
Supplement: Supplementary file 1 [file d3104350ec7170c3345fcc94.docx]

| **Questions for health professionals** |
| --- |
| 1. **Incident identification and description**   “As I have mentioned, we’re talking to providers who have conducted a video visit with a patient with who is not proficient in English.”  Do you proficiently speak any languages other than English?   - “Do you know roughly for how many patients you have conducted such a visit?” - CHW – how many patients you’ve helped get set up for telemedicine? - Is there a specific clinic you serve? - Can you tell me about the patients? - CHW – how often provider speaks the patients language - “Do you recall approximately what month and year your first conducted such a visit?” - “Do you recall approximately when you most recently conducted such a visit?” - “From what you recall, for what patient languages have you conducted a visit like this?”   “For your earliest visit(s), could you please walk me through how the process worked for these visits?”/ CHW – what you learned, how you knew the patient needed support   - How are patients referred to you? - How do you help them with their initial appointment - Do you provide them other materials to help them access their telemedicine visits? - What you hear from patients about video visits?   Probes/details to collect:   - What was your (the provider’s) technology setup? - What kinds of technologies (i.e. smartphone, tablet) did the patient use? - How or when did you know if the patient required and interpreter?   [For those who speak another language] – how did this compare with telemedicine visits where and interpreter was not needed?   - How did you connect the interpreter to the visit? - Did you have experiences where the telemedicine aspect wasn’t working? / Do you know what happened with those patients?   - Can you tell me more about what this looked like?   - What kinds of troubleshooting strategies did you try?   - Did you ever need to switch to a phone-only visit? / Provider ever call CHW?     - About how many times do you think this happened?     - How did you know it was time to try a different approach? - Were there any limited English proficient patients for which you were not able to use an interpreter and had to resort to a different approach? Please tell me about it.   - - About how many times do you think this happened? - Were there any patients with whom you were not able to connect at all due to issues with the telemedicine-based visit?   - - About how many times do you think this happened? - Could you or the patient see the interpreter? What was that like? - How did you handle documents or materials that would typically be printed out for the patient? |
| **2. Timeline and decision point identification [optional, complete as needed]:**  “Do I have this right?” [Repeat back the incident and confirm the sequence of events with the participant]” |
| **3. Deepening**  Updates*:  Are video visits done differently now? Improved or worsened? “Can you walk me through what a video visits with a patient who is not proficient in English looks like now?”  Monitoring:   - “What is your technology set up?” - “Do you know if the patient needed an interpreter before they started the visit? How?”   - “Has this changed over time?”   - “If not, how/when do you determine they needed an interpreter?” - “How do you connect the interpreter to the visit?” - “Can you typically see the interpreter?” - “Can the patient?” - “Do you know if the interpreter sees you or the patient or both?” - “Is this similar or different to arranging for an interpreter in your office [in-person] setting?”   What is going right:   - How often are you helping patients with video visits now? - How does the patient feel about doing video visits? - “What do you feel like works well in the current state of video visits for patients not proficient in English?” - “What do you think contributed to your ability to do [this] well? Examples may include office policies, support staff, the technology, knowledge of the patient or interpreter?” - “Were there other resources (e.g., time, materials, technology, people, expertise, standards/protocols) that were necessary?”   Constraints:   - “Are you are still having challenges in conducting telemedicine visits with patients not proficient in English?” If so, what types of challenges? - “How could you have been better supported to address these challenges? For example through processes, policies, training, other technology?”   Responding/Adaptive measures:   - “Were there other institutional or departmental changes that have helped facilitate video visits with patients not proficient in English?” - “Have you personally learned any strategies for improving these kinds of visits?” - “Have you heard of other strategies used by colleagues or other institutions that seem helpful but that you have not enacted personally? If so, what are they?   Anticipating/handling:   - “Had you conducted any video visits prior to COVID? Approximately how many?” CHW – supported video visit use prior to COVID? - “Had you ever conducted a video visit using an interpreter prior to the COVID pandemic? CHW – for how many patients? - “What media of interpreters have you worked with in the past [telephone, video, in-person]?” - “Did you have other experiences (prior to COVID) from your clinical practice to draw from to help you navigate these scenarios?” / Video visit set up similar to other things you’ve helped patients with? Or done yourself? - “Did you have general experiences (i.e. with communication technologies) that helped inform your current approach for these kinds of visits?” - “To what extent do you feel you have relied on guidelines in place vs. your own expertise or experience?”   Learning:   - What would you have told yourself in March of 2020 about helping your patients? - Do you think the strategies that your institution has put in place would be helpful for other institutions? Why or why not?” / What lessons would you tell other institutions about how your institution supports telemedicine visits for patients with LEP? - Have you developed any personal strategies as a clinician for supporting patients? - “Do you think the strategies that you personally enacted would be helpful to other providers? Why or why not? Have you shared these strategies with other providers?” - “What do you think would be the best way to disseminate these best practices/approaches to other staff members?” - For a health system that does not have community health workers and is struggling with this issue, what would you tell them is important? - “Are you aware of any conversations about continued improvement of these procedures at the departmental level? The health system level? Outside of the organization (e.g., government)?” |
| **4. “What-if” queries? [Skip if short on time]**  Future changes: “What kind of changes would you suggest to ensure that future or other providers are able to successfully manage similar situations?”   - What kinds of resources would have been helpful? - What kind of information would have been helpful?   Generalizability: “Do you think the changes or approach would have to differ based on/are their patients that need the most help?:   - Patient presentation/condition - Patient tech. skills - Other patient characteristics - Other provider characteristics |

| **Questions for patients – English version (actual interviews utilized a certified Spanish translation)** |
| --- |
| 1. **Incident identification and description**   “Like we have talked about, we are talking with patients like yourself who had a video or telephone visit with a doctor that did not speak Spanish.”   - “Can you tell us about how many of these visits you have had?” - “Do you remember around how long ago your first visit was?” What date? - “Ok, we want you to think back to your first visit [after the COVID lockdown in March, 2020].” - “As best you can remember, can you tell me the story of the visit starting with making an appointment?” - “If there are details you don’t remember from the first visit but remember from more recent visits, please feel free to add these in.”   Probes/details to collect:   - “Can you tell us how you made the appointment?” - “Do you remember if you had to prepare anything in advance? For example, download an app, sign up for a patient portal account?” - “Was there an interpreter there already to help you when the visit started?”   - “Did an interpreter arrive later?” “Do you know how they were connected to the call?”   - If no interpreter arrived – “How did you communicate with your doctor/health professional?” - “What did you use to talk to your doctor (phone, tablet, laptop)?” - “How was your connection?”   - “Was it easy for you to understand the doctor?”   - “Was it easy for the doctor to understand you?” - “Normally, you would receive some instructions and maybe prescriptions on paper when leaving an in-person appointment, how did this work for the telemedicine appointment?” - “Did you do this visit in your home?” If not, where? - “Did you feel the visit resolved the issue you were having? Why or why not?” - “Were there things about this first visit that did not go well? - “Were there things that did go well?” |
| **2. Timeline and decision point identification:**  “Do I have this right?” [Repeat back the incident and confirm the sequence of events with the participant]” |
| **3. Deepening**  Monitoring:   - “What made you decide to make a telemedicine appointment with your doctor?” - “How did you find out about your doctor offering video visits?” - “I want to ask about each of the steps you told me about. Do you remember if any of the information was in English and not Spanish?”   - Making the appointment   - Preparing for the appointment   - Connecting to the visit   - Communicating with the health professional   - Communicating with the interpreter   - Following up after the visit - For those with only one previous visit: “Is there a reason you have not had any more telemedicine visits? Was this a purposeful choice?” - For those with more than one visit: “What made you choose to schedule another visit via telemedicine?”, “Did you do anything different for later visits after the first one?”   Responding:   - “What did you do when you ran into information in English only in any of the steps for doing a telemedicine visit?” - “Did the doctor’s office(s) ask you before the visit if you needed an interpreter?” - “Did you have someone who could help you before, during, or after the visit?”   - If yes, “how do you think things would have gone without this person to help you?”   What went right:   - “What do you think works well in telemedicine visits?” “What do you find helpful about them?” - “Who helped these things go well? (office staff, community health worker, doctor, interpreter, technology)?” - “Were there other things that were helpful?”   - Instructions   - Technology (apps, headphones)   - Help from friend or family   Constraints:   - “Was there anything that did not go well or was difficult?” - “Do you think there was some kind of help or information that would have made it better?”   Adaptive measures:   - “When you noticed something was not going well, did you, the doctor, or interpreter try to make any changes (where you were sitting, how loud you were talking, getting someone to help)?” - “Were any parts of the visit done without the interpreter?” - “Were any parts of the visit done without video (i.e. only using audio)?”   Anticipating/handling:   - “Did you have a patient portal or ‘Connect’ account before your first visit?” - “Had you had any video visits before?” - “Was there an interpreter? How did that work?” - [For any adaptive strategies], “what gave you that idea?”   Learning:   - [If they have had multiple visits] – “Are there things that you feel like have gotten better over time related to having video or telephone visits with doctors that don’t speak Spanish?” - “Are there things that have gotten worse or feel less well-supported? - “Are there parts about the video visit you liked better than going to the doctor’s office?” - “Are there things about going to the office that you like better than a video or telephone visit?” - “Would you like to do a video visit again? Why/why not?” - [For any adaptive strategies] “Do you think that would help if you did another video visit? Would you try to do this every time?” - “Did you talk about how your visit went with friends, family, or other doctors you see?” - “Did you share with them any of the things you learned or tips for making this easier?” - “What would be a good way to share information about ‘best practices’ for video visits like this for future patients/” |
| **4. “What-if” queries? [**  Future changes: “What changes do you think would help make video visits better for patients who do not speak the same language as their doctors?” [Probe about each of the phases of the process]  Generalizability: “Do you think the things you mentioned would help all patients? Are there any patients that it may not help as much? What about patients who may be better/worse with technology than your self?” |
